# Supplementary material for: Mycobacterium tuberculosis H2S Functions as a Sink to Modulate Central Metabolism, Bioenergetics, and Drug Susceptibility
Source: MDPI journal article supplement (doi:10.3390/antiox10081285), 2021-08-13
Supplement: s1 [file s1]

Supplementary Materials:

***Mycobacterium tuberculosis* H<sub>2</sub>S Functions as a Sink to Modulate Central Metabolism, Bioenergetics, and Drug Susceptibility**

Tafara T. R. Kunota <sup>1,†</sup>, Md. Aejaazur Rahman <sup>1,†</sup>, Barry E. Truebody <sup>1</sup>, Jared S. Mackenzie <sup>1</sup>, Vikram Saini <sup>2</sup>, Dirk A. Lamprecht <sup>1,‡</sup>, John H. Adamson <sup>1</sup>, Ritesh R. Sevalkar <sup>3</sup>, Jack R. Lancaster Jr. <sup>4</sup>, Michael Berney <sup>5</sup>, Joel N. Glasgow <sup>3</sup> and Adrie J. C. Steyn <sup>1,3,6,\*</sup>

<sup>1</sup>Africa Health Research Institute, University of KwaZulu Natal, Durban, 4001, South Africa

<sup>2</sup>Department of Biotechnology, All India Institute of Medical Sciences, New Delhi -110029, India

<sup>3</sup>Department of Microbiology, University of Alabama at Birmingham, Birmingham, AL 35294, USA

<sup>4</sup>Department of Pharmacology and Chemical Biology and Vascular Medicine Institute, University of Pittsburgh School of Medicine, Pittsburgh, PA 15261, USA

<sup>5</sup>Department of Microbiology and Immunology, Albert Einstein College of Medicine, New York, NY 10464, USA

<sup>6</sup>Center for AIDS Research and Center for Free Radical Biology, University of Alabama at Birmingham, Birmingham, AL 35294, USA

† Co-first authors, both authors contributed equally.

‡ Current address: Janssen Pharmaceutica, Global Public Health, Turnhoutseweg 30, B-2340 Beerse, Belgium

\* Correspondence: [asteyn@uab.edu](mailto:asteyn@uab.edu)

## **Supplementary Figures and Tables**

**Supplementary Figure S1.** *Mtb* H<sub>2</sub>S production when exposed to exogenous Cys.

**Supplementary Figure S2.** Role of *Mtb* Rv1077 (CBS) in H<sub>2</sub>S production.

**Supplementary Figure S3.** Multiple sequence alignment of the CDS/CBS protein family.

**Supplementary Figure S4.** Complete Rv3684/Cds1 amino acid sequence.

**Supplementary Figure S5.** In-gel BC assay of purified Cds1 and confirmation of *cds1* deletion in *Mtb* strains.

**Supplementary Figure S6.** Survival of *cds1*-deficient *Mtb* in macrophages.

**Supplementary Figure S7.** *Mtb*  $\Delta$ *cds1* growth in the presence of fatty acids or precursors as a single carbon source.

**Supplementary Figure S8.** *Mtb* H<sub>2</sub>S production when cultured in the presence of fatty acids or precursors as a single carbon source.

**Supplementary Figure S9.** Role of Cbs (Rv1077) in *Mtb* respiration.

**Supplementary Figure S10.** AOAA inhibits Cys-mediated increases in *Mtb* respiration.

**Supplementary Figure S11.** Exogenous H<sub>2</sub>S reverses the respiratory defect in *Mtb*  $\Delta$ *cds1* cells.

**Supplementary Figure S12.** SDS-PAGE of purified O-acetylserine sulfhydrylase (OASS).

**Supplementary Figure S13.** Cds1 regulates amino acid metabolism in *Mtb*.

**Supplementary Figure S14.** Gating strategy for detection of DHE-positive *Mtb* cells for measuring ROI.

**Supplementary Figure S15.** Mycothiol and ergothioneine levels in *Mtb* after exposure to CHP.

**Supplementary Table S1.** Bacterial strains used in this study.

**Supplementary Table S2.** Plasmids used in this study.

**Supplementary Table S3.** Oligonucleotides used in this study.

**Supplementary Table S4.** *Mtb* H37Rv enzymes putatively involved in sulfur-containing amino acid biosynthesis, H<sub>2</sub>S production or sulfur metabolism.

## **REFERENCES**

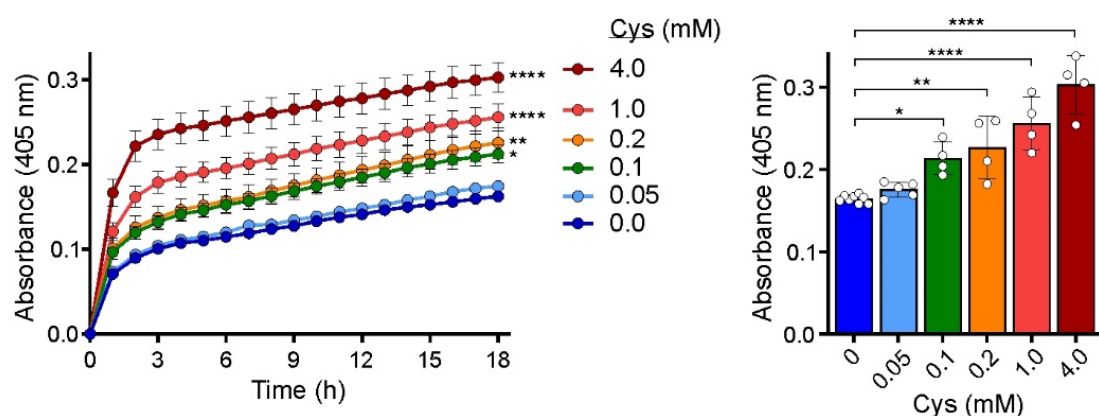

### Supplementary Figure S1. *Mtb* H<sub>2</sub>S production when exposed to exogenous Cys.

The BC assay was used to measure H<sub>2</sub>S production in *Mtb* when exposed to increasing concentrations of exogenous Cys (0-4 mM). The kinetics of H<sub>2</sub>S production is shown in the left panel, whereas endpoint levels after 18 hours are shown in the right panel. Note that *Mtb* does not require addition of exogenous Cys to produce H<sub>2</sub>S (see 0 mM Cys) and Figure 1. Data shown represents the mean  $\pm$  SEM for 4 – 5 biological replicates. Statistical analysis was performed using GraphPad Prism 8.4.3. Two-way ANOVA with Dunnett's multiple comparisons test was used to determine statistical significance compared to 0.0 mM Cys. \* $P < 0.05$ , \*\* $P < 0.01$ , \*\*\*\* $P < 0.0001$ .

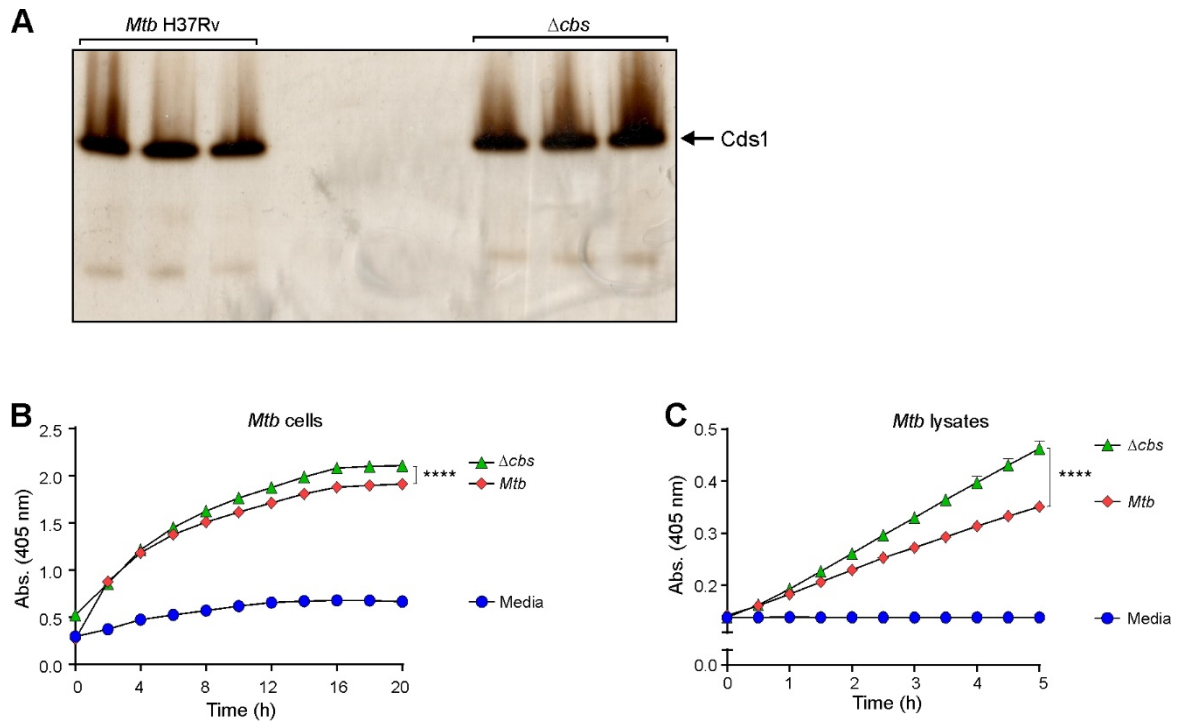

**Supplementary Figure S2. Role of *Mtb* Rv1077 (CBS) in H<sub>2</sub>S production.** (A) Lysates of *Mtb* H37Rv and the *Mtb* *rv1077/cbs* deletion strain ( $\Delta cbs$ ) were separated on a native polyacrylamide gel and assayed for H<sub>2</sub>S production using the in-gel BC assay. Arrow indicates the major H<sub>2</sub>S producing enzyme, ( $n = 3$ ). Time course of H<sub>2</sub>S production in (B) intact *Mtb* H37Rv and  $\Delta cbs$  cells, ( $n = 8$ ) and (C) cell lysates in the presence of 20 mM Cys using the BC assay ( $n = 8$ ). Representative experiments are shown. Each experiment was repeated independently at least twice. Data represent the mean  $\pm$  SD. Statistical analysis was performed using GraphPad Prism 8.4.3. One-way ANOVA with Dunnett's multiple comparisons test was used to determine statistical significance. \*\*\*\* $P < 0.0001$ .



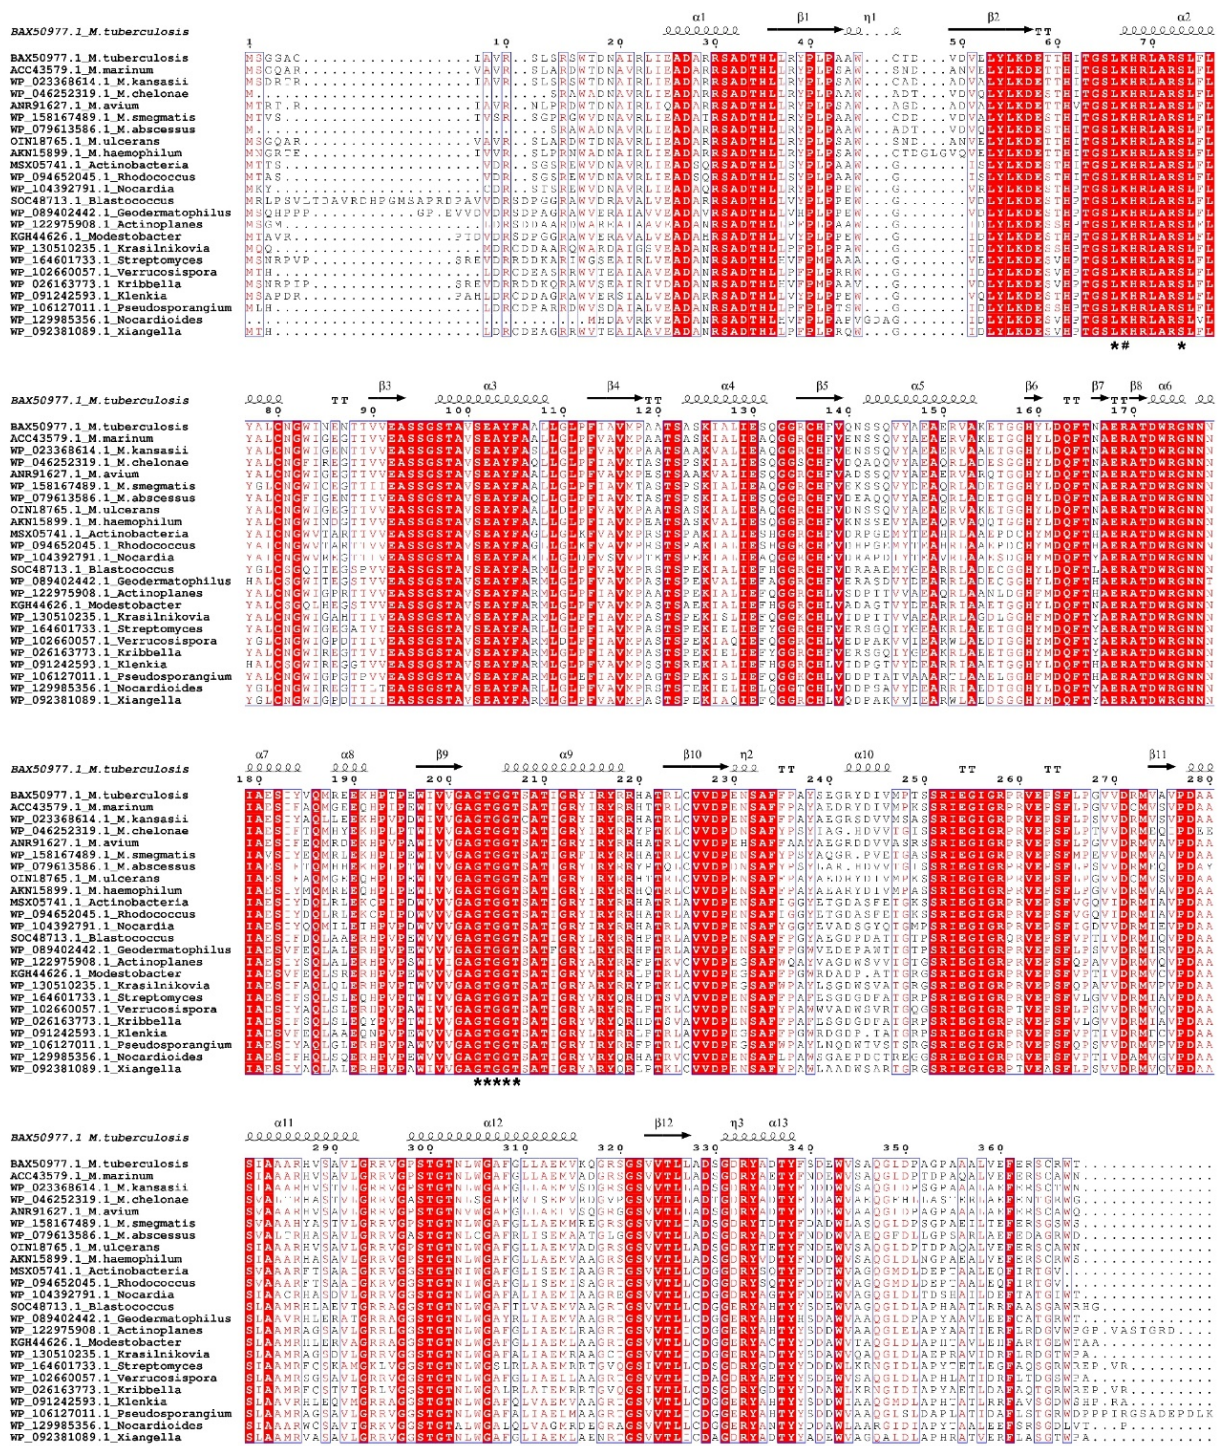

**Supplementary Figure S3. Multiple sequence alignment of the CDS/CBS protein family.**

Multiple sequence alignment of Cds1 BLASTp. Structural alignment performed using T-Coffee online software<sup>1</sup> and rendered with predicted secondary structures using the ESPrpt. 3.0 server<sup>2</sup>. Identical amino acids are shaded in red. Asterisks (\*) indicate residues of the predicted, conserved PLP binding domain (L<sup>66</sup>, S<sup>73</sup>, G<sup>203</sup>, T<sup>204</sup>, G<sup>205</sup>, G<sup>206</sup>, T<sup>207</sup>, S<sup>299</sup>, D<sup>329</sup>). # indicates the predicted catalytic residue (K<sup>67</sup>) which is conserved across orthologues with an identity >65%. Sequences were obtained from a BLASTp search of the NCBI database (<https://blast.ncbi.nlm.nih.gov/Blast.cgi>) using the primary sequence of Cds1 as identified by LC-MS/MS (Figure. 2c). CDS; cysteine desulfhydrase, CBS; cystathionine β-synthase.



**A**

N-terminal peptides detection in our study using LC MS/MS:

| Sequence              | # PSMs | Accessions No. | MH+ [Da]   | Abundance |
|-----------------------|--------|----------------|------------|-----------|
| MSGGACIAVRSLRSWTDNAIR | 1      | A0A089QT58     | 2408.20237 | Low       |
| SWTDNAIRLIEADAR       | 1      | A0A089QT58     | 1730.86492 | Low       |
| SLSRSWTDNAIRLIEADAR   | 2      | A0A089QT58     | 2174.11045 | Low       |
| SLSRSWTDNAIR          | 3      | A0A089QT58     | 1405.71416 | Low       |
| SWTDNAIRLIEADARR      | 1      | A0A089QT58     | 1886.99063 | Low       |

**B**

Full length gene and protein sequence of Rv3684:

P T V S V R Rv3683  
 ccg aca gtg tcg gtg cgt tga  
 Rv3684 → ttg agc ggc ggc gcc tgt atc gcg gtc cgc agc cta tcc cgg agc tgg acg gac aac  
 M S G G A C I A V R S L S R S W T D N  
 gcg atc cgg ttg atc gag gcg gac gcc cgc cgt agc gcc gac acc cac ctg ctg cgc tac cca ctg ccc gct gcc  
 A I R L I E A D A R R S A D T H L L R Y P L P A A  
 tgg tgc acg gat gtc gac gtc gag ctg tac ctc aag gac gag acg acc cat atc acc ggc agt ctc aaa cac cgg  
 W C T D V D V E L Y L K D E T T H I T G S L K H R  
 ttg gca cgt tcg ttg ttc ctc tat gcg cta tgc aac gcc tgg atc aac gag aac acc acg gtg gtg gag gca tgc  
 L A R S L F L Y A L C N G W I N E N T T V V E A S  
 tcg ggt tca acg gcg gtg tcc gag gcc tat ttc gcg gcg ctg ctg ggt ctg ccg ttc atc gcc gtg atg ccg gcc  
 S G S T A V S E A Y F A A L L G L P F I A V M P A  
 gcg acc agc gct tcc aaa atc gcg ttg atc gaa tca caa ggt gcc cgt tgt cat ttc gtc cag aat tca agt caa  
 A T S A S K I A L I E S Q G R C H F V Q N S S Q  
 gtg tac gcc gag gcg gag cgc gtc gcc aag gaa acc gcc gcc cac tat ctg gac cag ttc acc aac gcg gag cgc  
 V Y A E A E R V A K E T G G H Y L D Q F T N A E R  
 gca acc gac tgg cgc gcc aac aac aac atc gcc gag tgc atc tac gtg caa atg cgc gaa gag aag cac ccc acc  
 A T D W R G N H N I A E S I Y V Q M R E E K H P T  
 ccg gaa tgg atc gtc gtg ggt gcg gcc acc gcc gga acc agc gcg acg atc gcc cgc tac atc cgc tac cga cgg  
 P E W I V V G A G T G G T S A T I G R Y I R R R  
 cac gcg acc cgg ctg tgc gtc gtc gat ccg gag aat tcc gcg ttc ttc ccc gcg tac tcc gaa gcc cgg tac gac  
 H A T R L C V V D P E N S A F F P A Y S E G R Y D  
 atc gtc atg ccc aca tcg tcc cgt atc gag gcc atc gcc cgg ccg cgg gtc gag ccg tcg ttt ctg ccc ggt gtg  
 I V M P T S S R I E G I G R P R V E P S F L P G V  
 gtc gac cgc atg gtg ggc gtc ccc gac gcg gcg tgc atc gct gcc gcc cgg cat gtc agc gcc gtt ctg ggg cgc  
 V D R M V A V P D A A S I A A A R H V S A V L G R  
 cga gtg gga ccg tct acc gcc acc aac ctc tgg gcc gcg ttc gga ctg ctc gcc gag atg taa aag gac gcc cgc  
 R V G P S T G T N L W G A F G L L A E M V K Q G R  
 agc gcc tcg gtg gtc aca ctg ctc gcc gac agc gcc gat cgc tac gcc gac acc tac ttt tcc gac gag tgg gtc  
 S G S V V T L L A D S G D R Y A D T Y F S D E W V  
 agt gcc cag ggg ctc gat ccg gcc ggg ccg gct gcg gcg ctg gtg gaa ttc gag cgc tcc tgt cga tgg acg tga  
 S A Q G L D P A G P A A A L V E F E R S C R W T

**Supplementary Figure S4. Complete Rv3684/Cds1 amino acid sequence.** (A) A list of N-terminal peptide fragments of Cds1 detected by LC-MS/MS corresponding to the correct amino acid sequence of Cds1. (B) The correct *rv3684/cde1* ORF includes an additional 66 nucleotides encoding 22 additional N-terminal amino acids (highlighted in yellow) in contrast to the annotation in Mycobrowser.epfl.ch. The start codon of *cds1* overlaps the stop codon of *rv3683* and both ORFs are in different coding frames. The predicted start codon (ttg) of *cds1* in Mycobrowser.epfl.ch is indicated in the box. Color code of amino acid residues: Hydrophobic - AFILMVW (red); Polar - CGHNPQSTY (green); Basic charged - K and R (pink); Acidic charged - D and E (blue).

**A**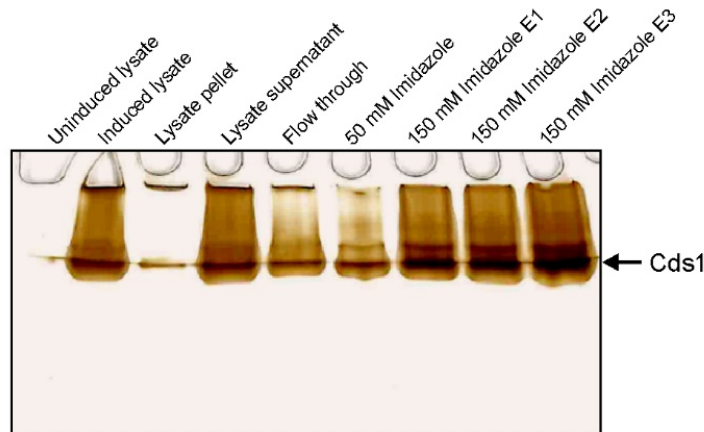**B**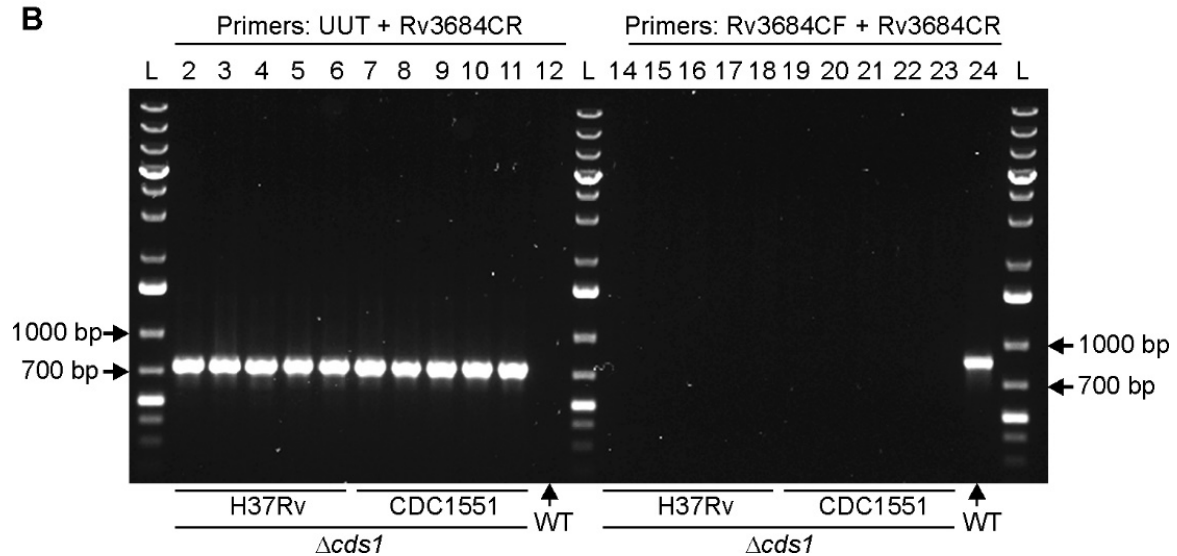

**Supplementary Figure S5. In-gel BC assay of purified Cds1 and confirmation of *cds1* deletion in *Mtb* strains.** (A) Eluted fractions of recombinant Cds1 were resolved on a native polyacrylamide gel and assayed for H<sub>2</sub>S production using the in-gel BC assay. (B) PCR confirmation of *Mtb* H37Rv ( $n = 5$ ) and CDC1551 *cds1* knockout mutants ( $n = 5$ ). Bands in lanes 2 to 6 (*Mtb* H37Rv) and lanes 7 to 11 (*Mtb* CDC1551) correspond to PCR amplicons (727 bp) generated using primers UUT and Rv3684CR. As the annealing site for primer UUT is only present in the disrupted *cds1*, no amplicon was generated for WT *Mtb* H37Rv (lane 12). The band in lane 24 corresponds to the PCR amplicon (819 bp) generated in WT *Mtb* H37Rv using primers Rv3684CF and Rv3684CR. The annealing site for primer Rv3684CF is present in *cds1*, but absent in the *cds1* deletion mutant and therefore no PCR amplicons were generated (lanes 14 to 23).

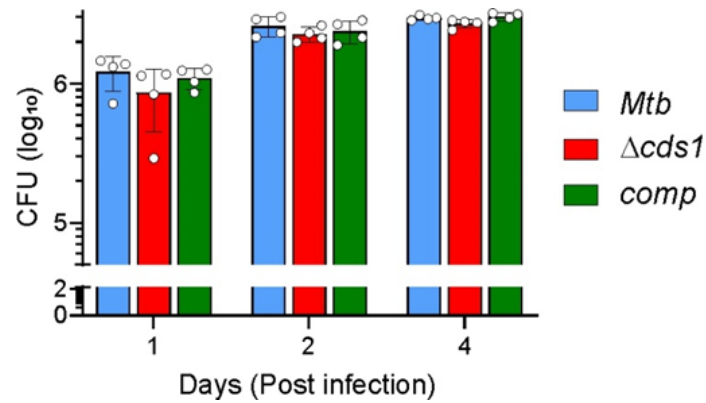

**Supplementary Figure S6. Survival of *cds1*-deficient *Mtb* in macrophages.** Peritoneal macrophages were obtained from C57BL/6 mice and infected with *Mtb* at an MOI ~0.2. Infected macrophages were lysed at indicated times after infection and lysates plated on 7H11 agar plates to determine bacillary burden. No statistically significant differences in cellular burden between WT *Mtb* and *Mtb*  $\Delta cds1$  cells were found. Data shown represents the mean  $\pm$  SD for 4 replicates. Statistical analysis was performed using GraphPad Prism 8.4.3. Two-way ANOVA with Dunnett's multiple comparisons test was used to determine statistical significance.



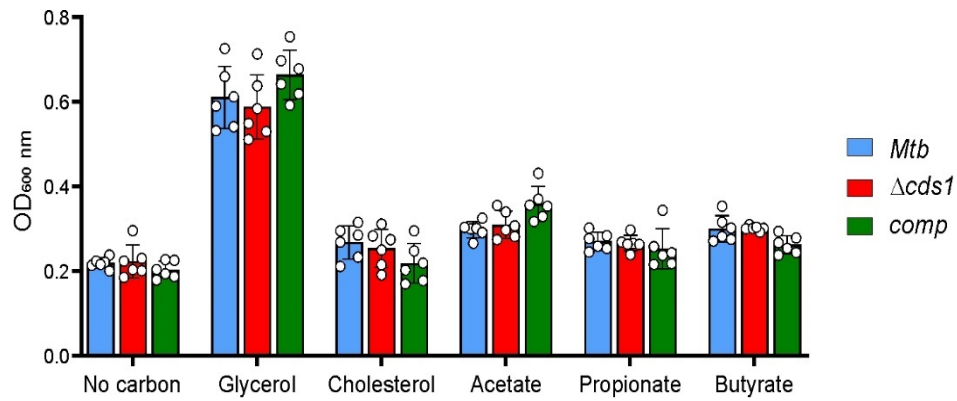

**Supplementary Figure S7. *Mtb*  $\Delta cds1$  growth in the presence of fatty acids or precursors as a single carbon source.** Growth of *Mtb* strains was monitored at OD<sub>600 nm</sub> using fatty acids or precursors (acetate) as a single carbon source. There were no significant growth differences between WT *Mtb* and  $\Delta cds1$  cells. Data shown represents the mean  $\pm$  SD for 6 replicates. Statistical analysis was performed using GraphPad Prism 8.4.3. Two-way ANOVA with Dunnett's multiple comparisons test was used to determine statistical significance.

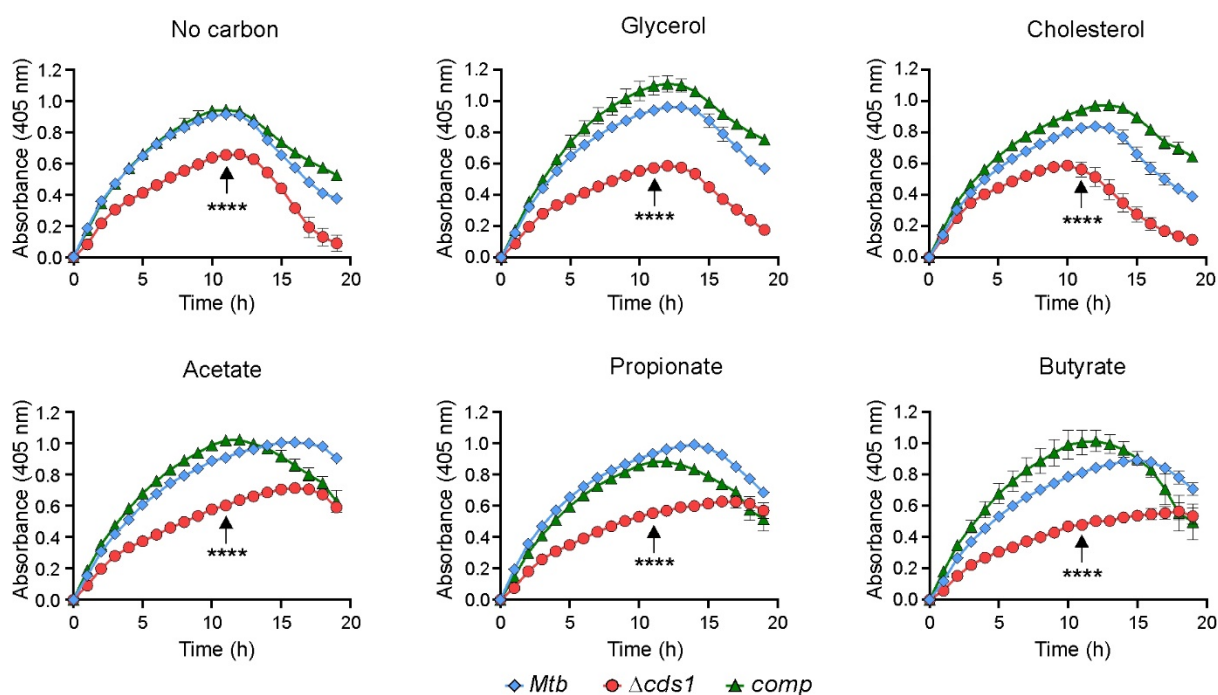

**Supplementary Figure S8. *Mtb* H<sub>2</sub>S production when cultured in the presence of fatty acids or precursors as a single carbon source.** The BC assay was used to measure H<sub>2</sub>S production of *Mtb* cultured in the presence of fatty acids or precursors (acetate) as a single carbon source. H<sub>2</sub>S production was significantly less in  $\Delta cds1$  cells compared to WT or complemented cells in all growth media at 12 h (vertical arrow). Data represent the mean  $\pm$  SEM for 4 replicates. Statistical analysis was performed using GraphPad Prism 8.4.3. Two-way ANOVA with Dunnett's multiple comparisons test was used to determine statistical significance. \*\*\*\* $P < 0.0001$ .

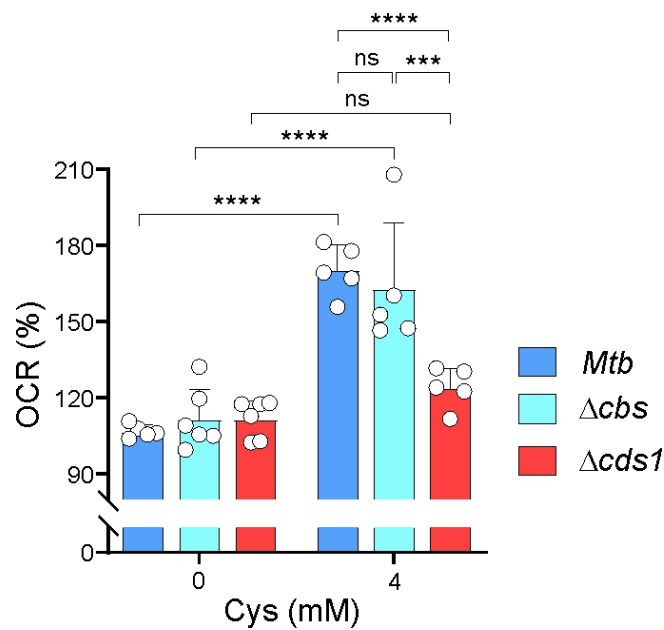

**Supplementary Figure S9. Role of Cbs (Rv1077) in *Mtb* respiration.** To determine whether Cbs (Rv1077) is important for respiration in *Mtb*, the oxygen consumption rates (OCR) of WT *Mtb*,  $\Delta cbs$  and  $\Delta cbs1$  were measured using an Agilent Seahorse XFe96 Analyzer. %OCR was measured in *Mtb* strains grown in medium containing 0 or 4 mM Cys. Cbs does not appear to play a significant role in *Mtb* respiration under these conditions. Note the role of Cds1 in respiration under the same conditions. One representative experiment is shown. The experiment was repeated twice. Data represent the mean  $\pm$  SD for 5 – 6 replicates. Statistical analysis was performed using GraphPad Prism 8.4.3. Two-way ANOVA with Tukey's multiple comparisons test was used to determine statistical significance. \*\*\* $P < 0.001$ , \*\*\*\* $P < 0.0001$ , ns – statistically non-significant.

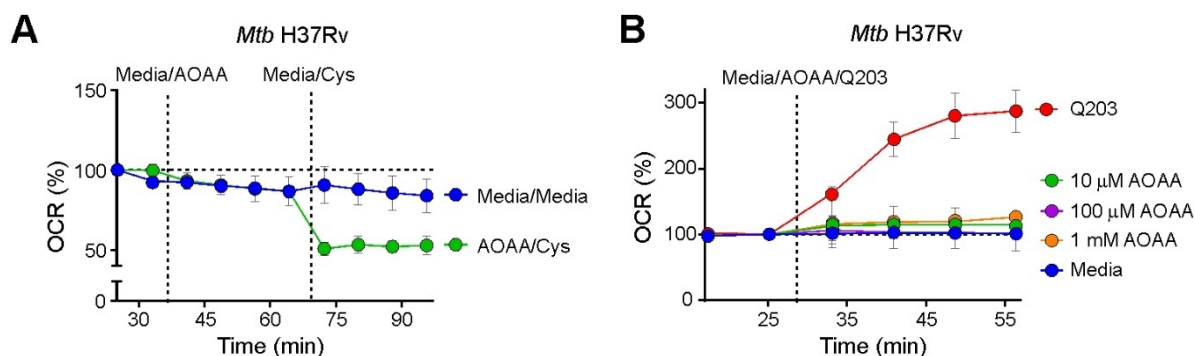

**Supplementary Figure S10. AOAA inhibits Cys-mediated increases in *Mtb* respiration.**

**(A)** %OCR of *Mtb* following sequential injection of 1 mM AOAA and 1 mM Cys, or media as a control. Whereas Cys increases respiration (Figure 5b), which can be inhibited by AOAA (Figure 5d), the data here suggest that pre-treatment of cells with AOAA affects metabolism by targeting PLP-dependent enzymes, but not respiration. Here, following Cys addition, AOAA-treated cells are unable to respond homeostatically to Cys-generated H<sub>2</sub>S that normally stimulates respiration. Under these conditions, AOAA inhibits numerous PLP-dependent enzymes as well as Cds1, which collectively are unable to maintain respiratory homeostasis.

**(B)** %OCR of *Mtb* grown in Cys-free medium and exposed to different concentrations of AOAA, showing that AOAA alone does not alter OCR. The 100  $\mu$ M AOAA data (magenta line) is obscured by other data points. Data are representative of 2-3 independent experiments, showing mean  $\pm$  SD for  $n = 6 - 8$  replicates. Statistical analysis was performed using GraphPad Prism 8.4.3. The anti-TB drug Q203 (300  $\times$  MIC<sub>50</sub>) that stimulates *Mtb* respiration was used as positive control in **(B)**.

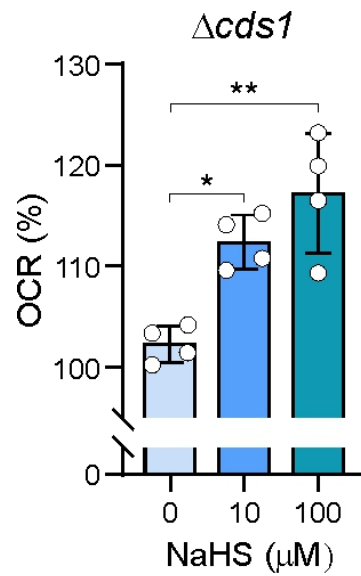

**Supplementary Figure S11. Exogenous H<sub>2</sub>S reverses the respiratory defect in *Mtb Δcds1* cells.** Exposing *Mtb Δcds1* cells to different concentrations (0, 10, 100 μM) of exogenous H<sub>2</sub>S (NaHS) increases bacillary %OCR. Data is representative of two independent experiments, showing mean ± SD for *n* = 4 replicates. Statistical analysis was performed using GraphPad Prism 8.4.3. Two-way ANOVA with Dunnett's multiple comparisons test was used to determine statistical significance. \**P* < 0.05, \*\**P* < 0.01.



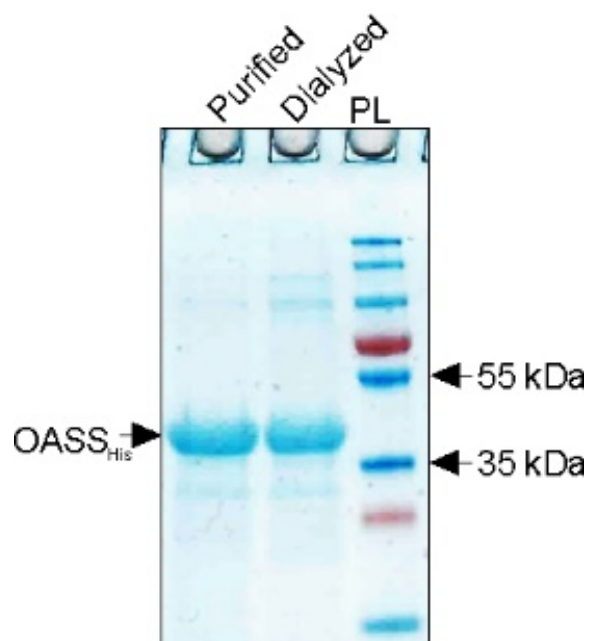

**Supplementary Figure S12. SDS-PAGE of purified *O*-acetylserine sulfhydrylase (OASS).** Recombinant OASS containing an N-terminal 6xHis tag was expressed from plasmid pET28b-EhOASS and purified from *E. coli* lysates as described previously<sup>3</sup>.

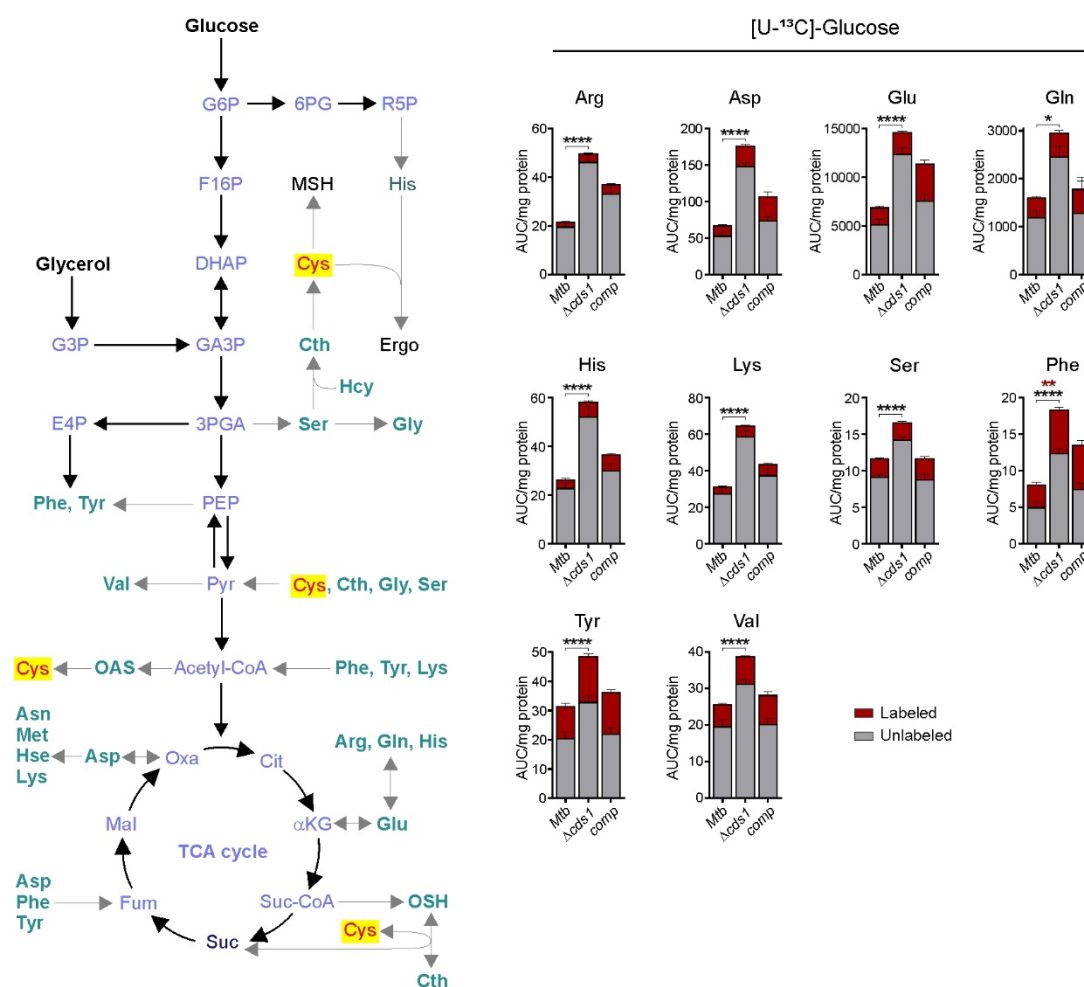

**Supplementary Figure S13. Cds1 regulates amino acid metabolism in *Mtb*.** *Mtb* strains were cultured in 7H9 medium with [U-<sup>13</sup>C]-Glucose (0.2%) followed by LC-MS/MS analysis. Total abundance of <sup>13</sup>C-labeled (Red) and unlabeled (Gray) amino acids are indicated. Representative experiments are shown; the experiment was repeated twice. Data shown represents the mean ± SEM for 3 – 5 biological replicates. Statistical analysis was performed using GraphPad Prism 8.4.3. Two-way ANOVA with Dunnett's multiple comparisons test was used to determine statistical significance. \**P* < 0.05, \*\**P* < 0.01, \*\*\*\**P* < 0.0001.

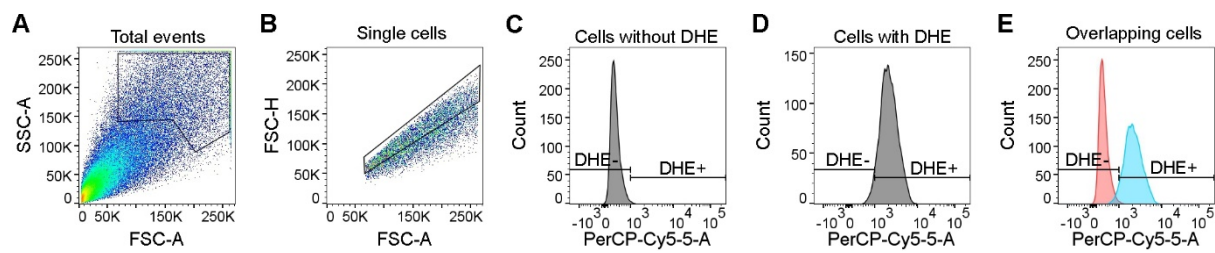

**Supplementary Figure S14. Gating strategy for detection of DHE-positive *Mtb* cells for measuring ROI.** ROI level in *Mtb* strains was measured using the dihydroethidium ROI-sensing dye (DHE, PerCP-Cy5.5). Gating strategy for **(A)** total events (100,000 cells), **(B)** single cells, **(C)** unstained cells without DHE, **(D)** DHE-stained cells, **(E)** overlapping histogram of (C) and (D) to show the population of DHE-positive and -negative cells.

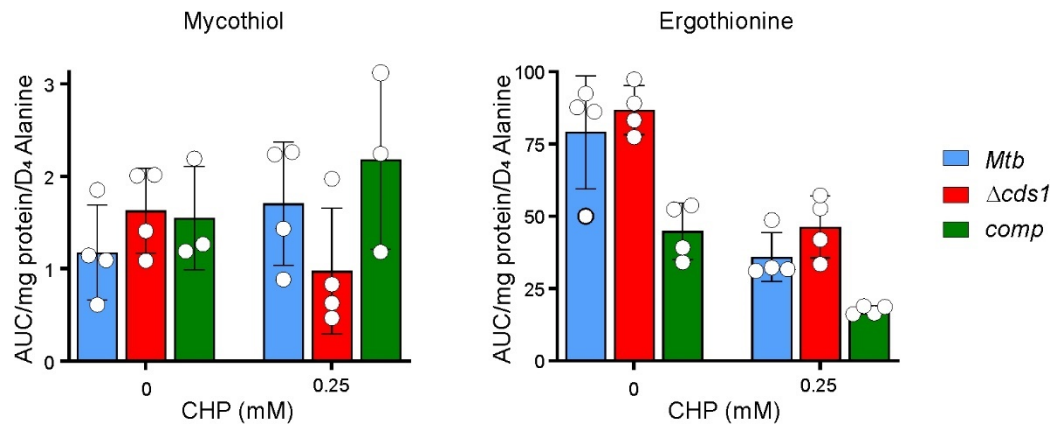

**Supplementary Figure S15. Mycothiol and ergothioneine levels in *Mtb* after exposure to CHP.** Mycothiol and ergothioneine were quantified in *Mtb* strains using LC-MS/MS after exposure to CHP for 16 h. No significant differences were observed between WT *Mtb* and *Mtb*  $\Delta cds1$  cells. Data shown represents the mean  $\pm$  SEM for  $n = 3-4$  replicates. Statistical analysis was performed using GraphPad Prism 8.4.3. Two-way ANOVA with Dunnett's multiple comparisons test was used to determine statistical significance.

**Supplementary Table S1.** Bacterial strains used in this study.

| Strain                                              | Description                                                                                                                | Source                                              |
|-----------------------------------------------------|----------------------------------------------------------------------------------------------------------------------------|-----------------------------------------------------|
| <i>M. tuberculosis</i> H37Rv                        | Wild type (wt)                                                                                                             | ATCC                                                |
| <i>M. bovis</i> BCG Pasteur                         | Vaccine strain                                                                                                             | ATCC                                                |
| <i>M. bovis</i>                                     | Wild type                                                                                                                  | ATCC                                                |
| <i>M. tuberculosis</i> TKK-01-0027                  | Clinical drug susceptible <i>Mtb</i> strain (DS27)                                                                         | Alex Pym, AHRI                                      |
| <i>M. tuberculosis</i> TKK-01-0047                  | Clinical drug susceptible <i>Mtb</i> strain (DS47)                                                                         | Alex Pym, AHRI                                      |
| <i>M. tuberculosis</i> TKK-01-0035                  | Clinical multi-drug resistant <i>Mtb</i> strain (MDR35)                                                                    | Alex Pym, AHRI                                      |
| <i>M. tuberculosis</i> TKK-01-0001                  | Clinical multi-drug resistant <i>Mtb</i> strain (MDR01)                                                                    | Alex Pym, AHRI                                      |
| <i>M. tuberculosis</i> $\Delta cbs$                 | <i>cbs</i> deletion mutant ( $\Delta cbs$ ) in H37Rv; Hyg <sup>R</sup>                                                     | This study                                          |
| <i>M. tuberculosis</i> $\Delta cds1$                | <i>cds1</i> deletion mutant ( $\Delta cds1$ ) in H37Rv; Hyg <sup>R</sup>                                                   | This study                                          |
| <i>M. tuberculosis</i> $\Delta cds1::hsp_{60}-cds1$ | <i>cds1</i> complement ( <i>comp</i> ) of $\Delta cds1$ ; Hyg <sup>R</sup> and Kan <sup>R</sup>                            | This study                                          |
| <i>M. tuberculosis</i> CDC1551                      | Wild type (wt)                                                                                                             | ATCC                                                |
| <i>M. tuberculosis</i> <i>Tn::rv3682</i>            | <i>rv3682</i> transposon insertion mutant in CDC1551; Kan <sup>R</sup>                                                     | John Hopkins University, School of Medicine, TARGET |
| <i>M. tuberculosis</i> <i>Tn::rv3683</i>            | <i>rv3683</i> transposon insertion mutant in CDC1551; Kan <sup>R</sup>                                                     | John Hopkins University, School of Medicine, TARGET |
| <i>M. tuberculosis</i> $\Delta cydAB$               | <i>cydAB</i> deletion mutant ( $\Delta cydAB$ ) in <i>Mtb</i> H37Rv; Hyg <sup>R</sup>                                      | Helena Boshoff <sup>12</sup> , NIAID                |
| <i>M. smegmatis</i> mc <sup>2</sup> 155             | Wild type (wt)                                                                                                             | ATCC                                                |
| <i>M. smegmatis</i> <i>wt<sub>p</sub>-cds1</i>      | <i>rv3682-rv3683-cds1</i> under control of the <i>Mtb</i> native promoter ( <i>wt<sub>p</sub></i> ) in mc <sup>2</sup> 155 | This study                                          |
| <i>M. smegmatis</i> <i>hsp<sub>60</sub>-cds1</i>    | <i>rv3682-rv3683-cds1</i> under control of the <i>hsp<sub>60</sub></i> promoter in mc <sup>2</sup> 155                     | This study                                          |



**Supplementary Table S2.** Plasmids used in this study.

| Vector/construct                                | Relevant genotype and properties                                                                                               | Source                                                                             |
|-------------------------------------------------|--------------------------------------------------------------------------------------------------------------------------------|------------------------------------------------------------------------------------|
| pMV261                                          | <i>E. coli</i> Mycobacterium shuttle vector, <i>hsp</i> <sub>60</sub> , <i>ColE1/pAL500 oriM</i> , Kan <sup>R</sup>            | William R. Jacobs Jr. (Albert Einstein College of Medicine)                        |
| pET28b-OASS                                     | Construct encoding N-terminally 6xHis-tagged EhOASS (O-acetylserine sulfhydrylase from <i>Entamoeba histolytica</i> )          | Alessandro Giuffrè (CNR Institute of Molecular Biology and Pathology, Rome, Italy) |
| <i>cds1</i> phasmid                             | <i>cds1::res-hyg-res</i>                                                                                                       | Michelle Larsen (Albert Einstein College of Medicine)                              |
| <i>cbs</i> phasmid                              | <i>cbs::res-hyg-res</i>                                                                                                        | Michelle Larsen (Albert Einstein College of Medicine)                              |
| pMV261:: <i>hsp</i> <sub>60</sub> - <i>cds1</i> | The <i>cds1</i> open reading frame cloned under the control of the <i>hsp</i> <sub>60</sub> promoter cloned into pMV261        | This study                                                                         |
| pMV261:: <i>wt</i> <sub>p</sub> - <i>cds1</i>   | The <i>rv3682-rv3683-cds1</i> open reading frames containing the native promoter ( <i>wt</i> <sub>p</sub> ) cloned into pMV261 | This study                                                                         |
| pET15b                                          | <i>amp</i> <sup>r</sup> , <i>E. coli</i> vector used for production of his-tag fused proteins                                  | Novagen                                                                            |
| pET15b- <i>cds1</i>                             | <i>Mtb cds1</i> ORF cloned into pET15b                                                                                         | This study                                                                         |

**Supplementary Table S3.** Oligonucleotides used in this study.

| Oligonucleotide | Sequence (5' → 3')              | Description                                                                 |
|-----------------|---------------------------------|-----------------------------------------------------------------------------|
| Rv3684F         | TATGGATCCTATGAGCGGCGGGGCCTGTATC | <i>cds1</i> forward primer for pMV261 subcloning, <i>Bam</i> HI             |
| Rv3684R         | GTTATCGATTAGGCTGCGGACCGCGATAC   | <i>cds1</i> reverse primer for pMV261 subcloning, <i>Cla</i> I              |
| ponABCF         | TAAGGATCCAAGGTAGTCCGACCACGAAAC  | <i>rv3682</i> , <i>rv3683</i> and <i>cds1</i> forward primer, <i>Bam</i> HI |
| ponABCR         | ATAATCGATCTACCAAGCTGCGCCACAC    | <i>rv3682</i> , <i>rv3683</i> and <i>cds1</i> reverse primer, <i>Cla</i> I  |
| Rv3684CF        | GAACCCAATGAACTATCTGAC           | Forward primer for $\Delta cds1$ confirmation                               |
| Rv3684CR        | GCATAGCGCATAGAGGAA              | Reverse primer for $\Delta cds1$ confirmation                               |
| UUT             | GATGTCTCACTGAGGTCTCT            | "Universal uptag" primer for $\Delta cds1$ confirmation                     |
| Rv3684CEF       | AATAATCATATGTTGAGCGGCGGGGCCT    | <i>cds1</i> forward primer for pET15b subcloning, <i>Nde</i> I              |
| Rv3684CER       | AATAATGGATCCTCAGTCCATCGACAG     | <i>cds1</i> reverse primer for pET15b subcloning, <i>Bam</i> HI             |
| Rv1077CF        | GGTCGACTATCGGTTGATT             | Forward primer for $\Delta rv1077$ confirmation                             |
| Rv1077CR        | ACATTGCGTTTATCCTCACT            | Reverse primer for $\Delta rv1077$ confirmation                             |

**Supplementary Table S4.** *Mtb* H37Rv enzymes putatively involved in sulfur-containing amino acid biosynthesis, H<sub>2</sub>S production or sulfur metabolism.

|    | Enzymes capable of Sulfide reactions                                               | <i>Mtb</i> Locus | Gene Product               | Annotated Pathway/Function                                                                 | Catalytic Activity                                                                                                                                                       | Ref.   |
|----|------------------------------------------------------------------------------------|------------------|----------------------------|--------------------------------------------------------------------------------------------|--------------------------------------------------------------------------------------------------------------------------------------------------------------------------|--------|
| 1  | Probable cystathionine $\gamma$ -synthase/O-succinyl homoserine sulphydrylase      | Rv0391           | MetZ                       | Methionine Biosynthesis/ Probable Cystathionine $\gamma$ -synthase                         | O-succinylhomoserine $\rightarrow$ homocysteine                                                                                                                          | 4      |
| 2  | Cysteine synthase                                                                  | Rv0848           | CysK2                      | Cysteine Biosynthesis                                                                      | (1) O-phospho-L-serine $\rightarrow$ S-sulfocysteine<br>(2) O-phospho-L-serine + H <sub>2</sub> S $\rightarrow$ L-cysteine + phosphate                                   | 5      |
| 3  | Cystathionine $\beta$ -synthase                                                    | Rv1077           | CBS                        | Cysteine Biosynthesis/Serine sulphydryase/ Transulfuration Pathway                         | (1) homocysteine + serine $\rightarrow$ cystathionine (2) cysteine + homocysteine $\rightarrow$ cystathionine + H <sub>2</sub> S                                         | 6      |
| 4  | Cystathionine $\gamma$ -synthase/cystathionine $\gamma$ -lyase                     | Rv1079           | MetB                       | Methionine Biosynthesis/Probable Cystathionine $\gamma$ -synthase/ Transulfuration Pathway | (1) O-succinyl-L-homoserine + L-cysteine $\rightarrow$ cystathionine + succinate<br>(2) cystathionine $\rightarrow$ $\alpha$ -ketobutyrate + NH <sub>3</sub>             | 4      |
| 5  | Cysteine synthase                                                                  | Rv1336           | CysM                       | Cysteine Biosynthesis                                                                      | O-phospho-L-serine + CysO-SH $\rightarrow$ CysO-Cys + PO <sub>4</sub> <sup>3-</sup>                                                                                      | 5      |
| 6  | Cysteine synthase                                                                  | Rv2334           | CysK1                      | Cysteine Biosynthesis                                                                      | O-acetyl-L-serine + H <sub>2</sub> S $\rightarrow$ L-cysteine + acetate                                                                                                  | 5      |
| 7  | Ferredoxin-dependent sulfite reductase                                             | Rv2391           | SirA                       | Sulfate Assimilation                                                                       | SO <sub>3</sub> <sup>2-</sup> $\rightarrow$ S <sup>2-</sup>                                                                                                              | 7      |
| 8  | Methionine synthase                                                                | Rv3340           | MetC                       | Methionine Biosynthesis/Probable O-acetyl homoserine sulphydrylase                         | (1) O-acetyl-L-homoserine + methanethiol $\rightarrow$ L-methionine + acetate<br>(2) O-acetyl-L-homoserine + H <sub>2</sub> S $\leftrightarrow$ L-homocysteine + acetate | 8      |
| 10 | Probable cysteine desulphydrase/ cysteine synthase /cystathionine $\gamma$ -lyase? | Rv3684           | Cysteine synthase or lyase | Unclassified/Cys Metabolism/ Transulfuration Pathway?                                      | Cysteine $\rightarrow$ pyruvate + H <sub>2</sub> S + NH <sub>3</sub>                                                                                                     | 9      |
| 11 | Probable cysteine desulfurase                                                      | Rv3025 c         | iscS                       | Carbon Sulfur Lyase                                                                        | [sulfur carrier]-H + L-cysteine- [sulfur carrier]-SH + L-alanine                                                                                                         | 10, 11 |

## References

1. Robert X, Gouet P. Deciphering key features in protein structures with the new ENDscript server. *Nucleic Acids Research* **42**, W320-324 (2014).
2. Notredame C, Higgins DG, Heringa J. T-Coffee: A novel method for fast and accurate multiple sequence alignment. *Journal of Molecular Biology* **302**, 205-217 (2000).
3. Forte E, *et al.* The Terminal Oxidase Cytochrome bd Promotes Sulfide-resistant Bacterial Respiration and Growth. *Sci Rep* **6**, 23788 (2016).
4. Parish T, Gordhan BG, McAdam RA, Duncan K, Mizrahi V, Stoker NG. Production of mutants in amino acid biosynthesis genes of *Mycobacterium tuberculosis* by homologous recombination. *Microbiology* **145** ( Pt 12), 3497-3503 (1999).
5. Schnell R, Sriram D, Schneider G. Pyridoxal-phosphate dependent mycobacterial cysteine synthases: Structure, mechanism and potential as drug targets. *Biochimica et Biophysica Acta* **1854**, 1175-1183 (2015).
6. Singhal A, *et al.* Regulation of homocysteine metabolism by *Mycobacterium tuberculosis* S-adenosylhomocysteine hydrolase. *Sci Rep* **3**, 2264 (2013).
7. Hatzios SK, Bertozzi CR. The regulation of sulfur metabolism in *Mycobacterium tuberculosis*. *PLoS Pathogens* **7**, e1002036 (2011).
8. Yin J, *et al.* Expression, purification and preliminary crystallographic analysis of O-acetylhomoserine sulfhydrylase from *Mycobacterium tuberculosis*. *Acta Crystallographica Section F, Structural biology and crystallization communications* **67**, 959-963 (2011).
9. Burns-Huang K, Mundhra S. *Mycobacterium tuberculosis* cysteine biosynthesis genes *mec+*-*cysO*-*cysM* confer resistance to clofazimine. *Tuberculosis (Edinburgh, Scotland)* **115**, 63-66 (2019).
10. Singh A, *et al.* *Mycobacterium tuberculosis* WhiB3 responds to O<sub>2</sub> and nitric oxide via its [4Fe-4S] cluster and is essential for nutrient starvation survival. *Proc Natl Acad Sci U S A* **104**, 11562-11567 (2007).
11. Schwartz CJ, Djaman O, Imlay JA, Kiley PJ. The cysteine desulfurase, IscS, has a major role in in vivo Fe-S cluster formation in *Escherichia coli*. *Proc Natl Acad Sci U S A* **97**, 9009-9014 (2000).
12. Arora K, *et al.* Respiratory flexibility in response to inhibition of cytochrome C oxidase in *Mycobacterium tuberculosis*. *Antimicrob Agents Chemother* **58**, 6962-6965 (2014).
